# Supplementary material
Source: MDPI journal article supplement (https://www.mdpi.com/2071-1050/15/5/4245)
Supplement: s1 [file s1]

## Supplementary Materials

**Table S1.** Fuzzy if-then rules for the ANFIS-GP1 used in this study.

| Rule No. | Rule description |              |              |                 |
|----------|------------------|--------------|--------------|-----------------|
|          | Antecedent part  |              |              | Consequent part |
|          | If $x_1$ is      | and $x_2$ is | and $x_3$ is | $y_1$ equals    |
| 1        | MF1 $_{x_1}$     | MF1 $_{x_2}$ | MF1 $_{x_3}$ | MF1 $_{y_1}$    |
| 2        | MF1 $_{x_1}$     | MF1 $_{x_2}$ | MF2 $_{x_3}$ | MF2 $_{y_1}$    |
| 3        | MF1 $_{x_1}$     | MF2 $_{x_2}$ | MF1 $_{x_3}$ | MF3 $_{y_1}$    |
| 4        | MF1 $_{x_1}$     | MF2 $_{x_2}$ | MF2 $_{x_3}$ | MF4 $_{y_1}$    |
| 5        | MF2 $_{x_1}$     | MF1 $_{x_2}$ | MF1 $_{x_3}$ | MF5 $_{y_1}$    |
| 6        | MF2 $_{x_1}$     | MF1 $_{x_2}$ | MF2 $_{x_3}$ | MF6 $_{y_1}$    |
| 7        | MF2 $_{x_1}$     | MF2 $_{x_2}$ | MF1 $_{x_3}$ | MF7 $_{y_1}$    |
| 8        | MF2 $_{x_1}$     | MF2 $_{x_2}$ | MF2 $_{x_3}$ | MF8 $_{y_1}$    |

ANFIS-GP: grid partitioning-based adaptive-neuro fuzzy inference; MF: membership function; MF1 and MF2 are in the form of *trimf* (refer to Table S2 for the *trimf* parameters);  $x_1$ : FT;  $x_2$ : TMP;  $x_3$ : CFV (refer to Table 1 for FT, TMP and CFV values);  $y_1$ : predicted normalized flux.

**Table S2.** Antecedent parameters of the ANFIS-GP1 used in this study.

| Input MFs | Type of MFs  | MFs' Parameters | Model Inputs |       |        |
|-----------|--------------|-----------------|--------------|-------|--------|
|           |              |                 | $x_1$        | $x_2$ | $x_3$  |
| MF1       | <i>trimf</i> | $a$             | -80.000      | 0.000 | -0.040 |
|           |              | $b$             | 10.000       | 0.798 | 0.585  |
|           |              | $c$             | 100.000      | 1.602 | 1.172  |
| MF2       | <i>trimf</i> | $a$             | 10.056       | 0.806 | 0.575  |
|           |              | $b$             | 100.000      | 1.597 | 1.206  |
|           |              | $c$             | 190.000      | 2.400 | 1.820  |

MF: membership function; *trimf*: triangular-shaped MF; Parameters  $a$  and  $c$  define the feet of MF, and  $b$  defines its peak;  $x_1$ : FT;  $x_2$ : TMP;  $x_3$ : CFV; The values were rounded off to three decimal places.

**Table S3.** Consequent parameters of the ANFIS-GP1 used in this study.

| Model's output MFs | Output MF <sub><math>i</math></sub> = $\alpha_i x_1 + \beta_i x_2 + \gamma_i x_3 + \delta_i$ ; $i = 1, 2, \dots, 8$ |           |            |            |
|--------------------|---------------------------------------------------------------------------------------------------------------------|-----------|------------|------------|
|                    | $\alpha_i$                                                                                                          | $\beta_i$ | $\gamma_i$ | $\delta_i$ |
| MF1                | -0.150                                                                                                              | 0.548     | 3.171      | -0.269     |
| MF2                | -0.247                                                                                                              | 1.549     | 2.854      | -1.631     |
| MF3                | -0.222                                                                                                              | 0.556     | 3.393      | -0.044     |
| MF4                | -0.541                                                                                                              | 1.582     | 3.792      | -0.725     |
| MF5                | -0.148                                                                                                              | 8.416     | 4.015      | 5.126      |
| MF6                | -0.244                                                                                                              | 18.892    | 1.249      | 8.144      |
| MF7                | -0.220                                                                                                              | 8.399     | 5.684      | 6.694      |
| MF8                | -0.537                                                                                                              | 18.890    | 8.038      | 14.516     |

MF: membership function;  $\alpha_i$ ,  $\beta_i$ ,  $\gamma_i$ , and  $\delta_i$  are consequent parameters;  $x_1$ : FT;  $x_2$ : TMP;  $x_3$ : CFV; The values were rounded off to three decimal places.

**Table S4.** Fuzzy if-then rules for the ANFIS-GP2 used in this study.

| Rule No. | Rule description                |                                 |                                 |                                 |
|----------|---------------------------------|---------------------------------|---------------------------------|---------------------------------|
|          | Antecedent part                 |                                 |                                 | Consequent part                 |
|          | If $x_1$ is                     | and $x_2$ is                    | and $x_3$ is                    | $y_2$ equals                    |
| 1        | MF1 <sub><math>x_1</math></sub> | MF1 <sub><math>x_2</math></sub> | MF1 <sub><math>x_3</math></sub> | MF1 <sub><math>y_2</math></sub> |
| 2        | MF1 <sub><math>x_1</math></sub> | MF1 <sub><math>x_2</math></sub> | MF2 <sub><math>x_3</math></sub> | MF2 <sub><math>y_2</math></sub> |
| 3        | MF1 <sub><math>x_1</math></sub> | MF2 <sub><math>x_2</math></sub> | MF1 <sub><math>x_3</math></sub> | MF3 <sub><math>y_2</math></sub> |
| 4        | MF1 <sub><math>x_1</math></sub> | MF2 <sub><math>x_2</math></sub> | MF2 <sub><math>x_3</math></sub> | MF4 <sub><math>y_2</math></sub> |
| 5        | MF2 <sub><math>x_1</math></sub> | MF1 <sub><math>x_2</math></sub> | MF1 <sub><math>x_3</math></sub> | MF5 <sub><math>y_2</math></sub> |
| 6        | MF2 <sub><math>x_1</math></sub> | MF1 <sub><math>x_2</math></sub> | MF2 <sub><math>x_3</math></sub> | MF6 <sub><math>y_2</math></sub> |
| 7        | MF2 <sub><math>x_1</math></sub> | MF2 <sub><math>x_2</math></sub> | MF1 <sub><math>x_3</math></sub> | MF7 <sub><math>y_2</math></sub> |
| 8        | MF2 <sub><math>x_1</math></sub> | MF2 <sub><math>x_2</math></sub> | MF2 <sub><math>x_3</math></sub> | MF8 <sub><math>y_2</math></sub> |

MF: membership function; MF1 and MF2 are in the form of *gaussmf* (refer to Table S5 for the *gaussmf* parameters);  $x_1$ : FT;  $x_2$ : TMP;  $x_3$ : CFV (refer to Table 1 for FT, TMP and CFV values);  $y_2$ : predicted xylitol concentration.

**Table S5.** Antecedent parameters of the ANFIS-GP xylitol model used in this study.

| Input MFs | Type of MFs    | MFs' Parameters | Model inputs |       |       |
|-----------|----------------|-----------------|--------------|-------|-------|
|           |                |                 | $x_1$        | $x_2$ | $x_3$ |
| MF1       | <i>gaussmf</i> | $\sigma$        | 38.221       | 0.106 | 0.228 |
|           |                | $c$             | 10.002       | 0.696 | 0.599 |
| MF2       | <i>gaussmf</i> | $\sigma$        | 38.220       | 0.350 | 0.146 |
|           |                | $c$             | 100.001      | 1.579 | 1.272 |

MF: membership function; *gaussmf*: Gaussian-shaped MF; " $c$ " represents the center of the MF, and  $\sigma$  indicates the width of the MF;  $x_1$ : FT;  $x_2$ : TMP;  $x_3$ : CFV; The values were rounded off to three decimal places.

**Table S6.** Consequent parameters of the ANFIS-GP xylitol model used in this study.

| Model's output MFs | Output MF <sub><math>i</math></sub> = $\alpha_i x_1 + \beta_i x_2 + \gamma_i x_3 + \delta_i$ ; $i = 1, 2, \dots, 8$ |           |            |            |
|--------------------|---------------------------------------------------------------------------------------------------------------------|-----------|------------|------------|
|                    | $\alpha_i$                                                                                                          | $\beta_i$ | $\gamma_i$ | $\delta_i$ |
| MF1                | -0.031                                                                                                              | 5.152     | 1.452      | 1.370      |
| MF2                | -0.084                                                                                                              | 13.997    | 3.945      | 3.722      |
| MF3                | -0.012                                                                                                              | 5.063     | -0.084     | 9.699      |
| MF4                | -0.012                                                                                                              | -0.638    | 2.380      | 14.354     |
| MF5                | -0.038                                                                                                              | 28.614    | -6.477     | -6.111     |
| MF6                | -0.103                                                                                                              | 77.737    | -17.597    | -16.601    |
| MF7                | -0.028                                                                                                              | 7.060     | 6.792      | 3.644      |
| MF8                | -0.004                                                                                                              | 2.003     | 14.821     | -4.416     |

MF: membership function;  $\alpha_i$ ,  $\beta_i$ ,  $\gamma_i$  and  $\delta_i$  are consequent parameters;  $x_1$ : FT;  $x_2$ : TMP;  $x_3$ : CFV; The values were rounded off to three decimal places.
